# Supplementary material for: Extracting higher-conductivity designs for solid polymer electrolytes by quantum-inspired annealing
Source: Royal Society of Chemistry journal article supplement (doi:10.1039/d3ra01982a), 2023-01-01
Supplement: d3ra01982a1.pdf [file d3ra01982a1.pdf]

Supplementary Information

**Extracting higher-conductivity designs for solid polymer electrolytes by quantum-inspired annealing**

Kan Hatakeyama-Sato,\* Yasuei Uchima, Takahiro Kashikawa, Koichi Kimura, and Kenichi Oyaizu\*

**Table S1** Hyperparameter optimization of regression models.

| <b>Model</b>  | <b>Hyperparameter</b> | <b>MAE</b> |
|---------------|-----------------------|------------|
| Ridge         | $\alpha = 0.1$        | 2.31       |
| Ridge         | $\alpha = 1$          | 1.87       |
| Ridge         | $\alpha = 10$         | 1.51       |
| Ridge         | $\alpha = 100$        | 1.31       |
| Ridge         | $\alpha = 1000$       | 1.31       |
| Quadratic     | $\alpha = 0.1$        | 2.25       |
| Quadratic     | $\alpha = 1$          | 1.56       |
| Quadratic     | $\alpha = 10$         | 1.16       |
| Quadratic     | $\alpha = 100$        | 1.11       |
| Quadratic     | $\alpha = 1000$       | 1.16       |
| Random forest | max_depth = 3         | 1.23       |
| Random forest | max_depth = 5         | 1.21       |
| Random forest | max_depth = 10        | 1.15       |
| Random forest | max_depth = $\infty$  | 1.17       |

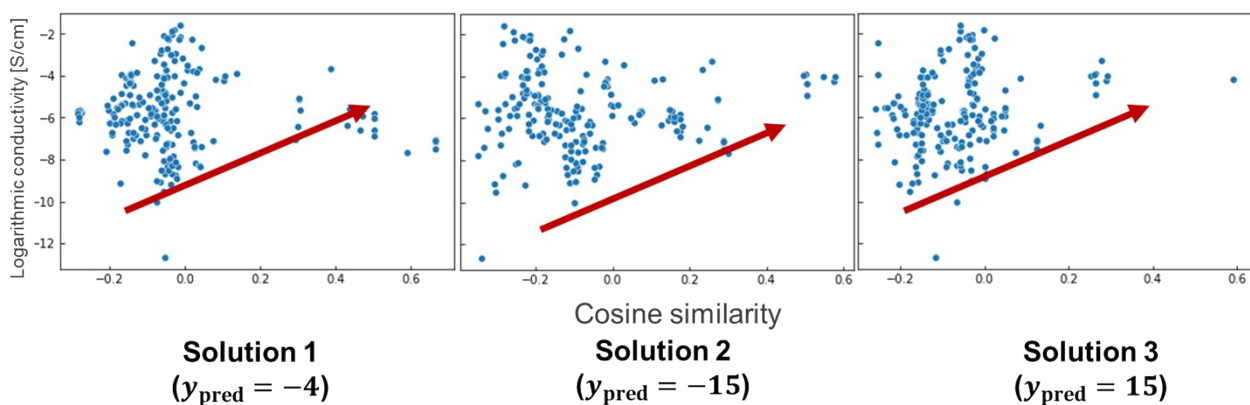

**Fig. S1** Relationships between cosine similarity to ideal solutions  $X_{\text{ideal}}$  and experimental conductivities for the training dataset.

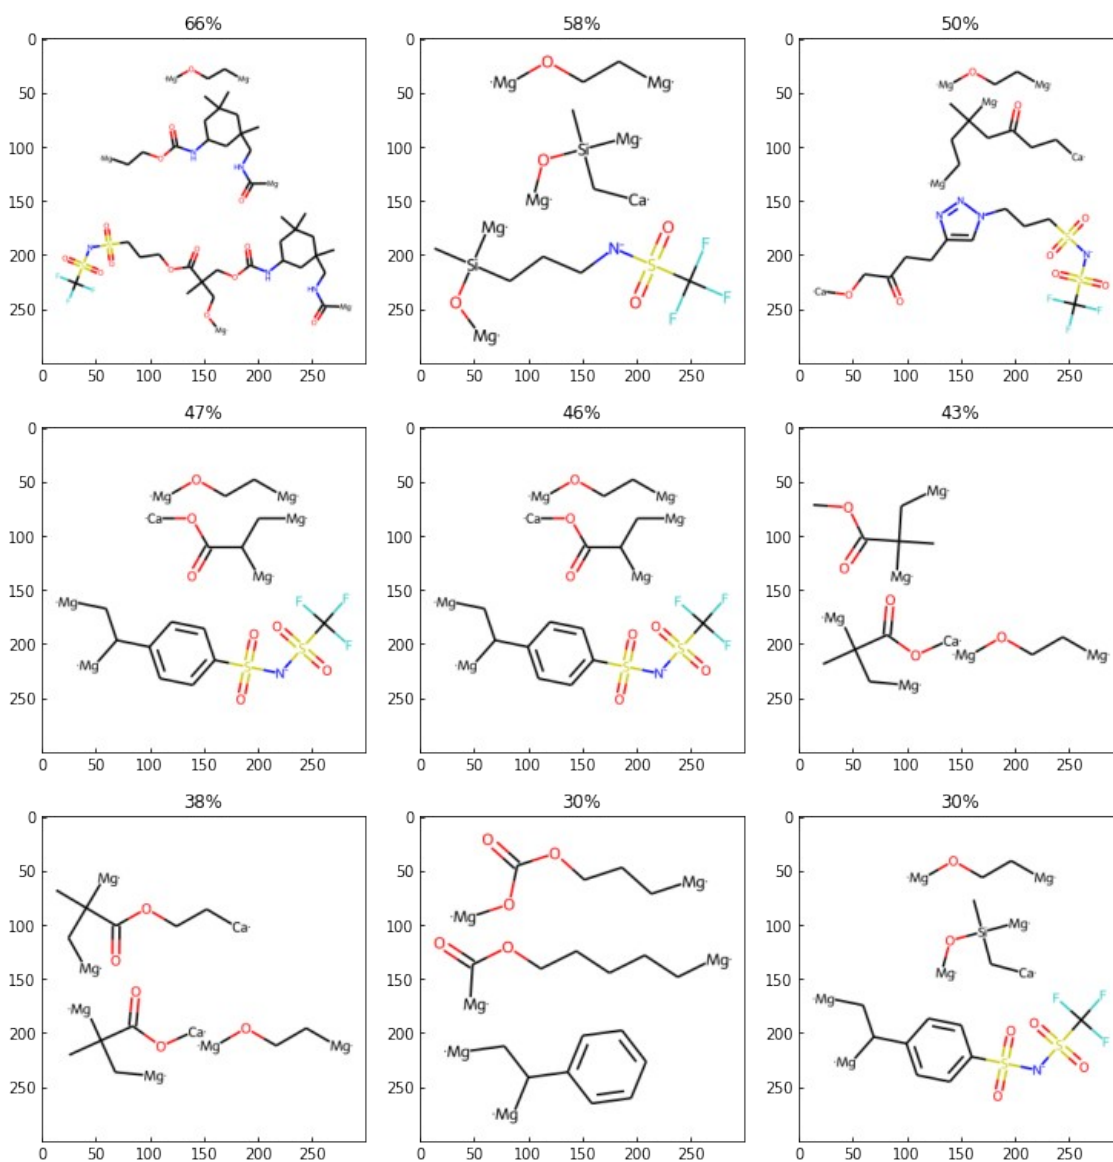

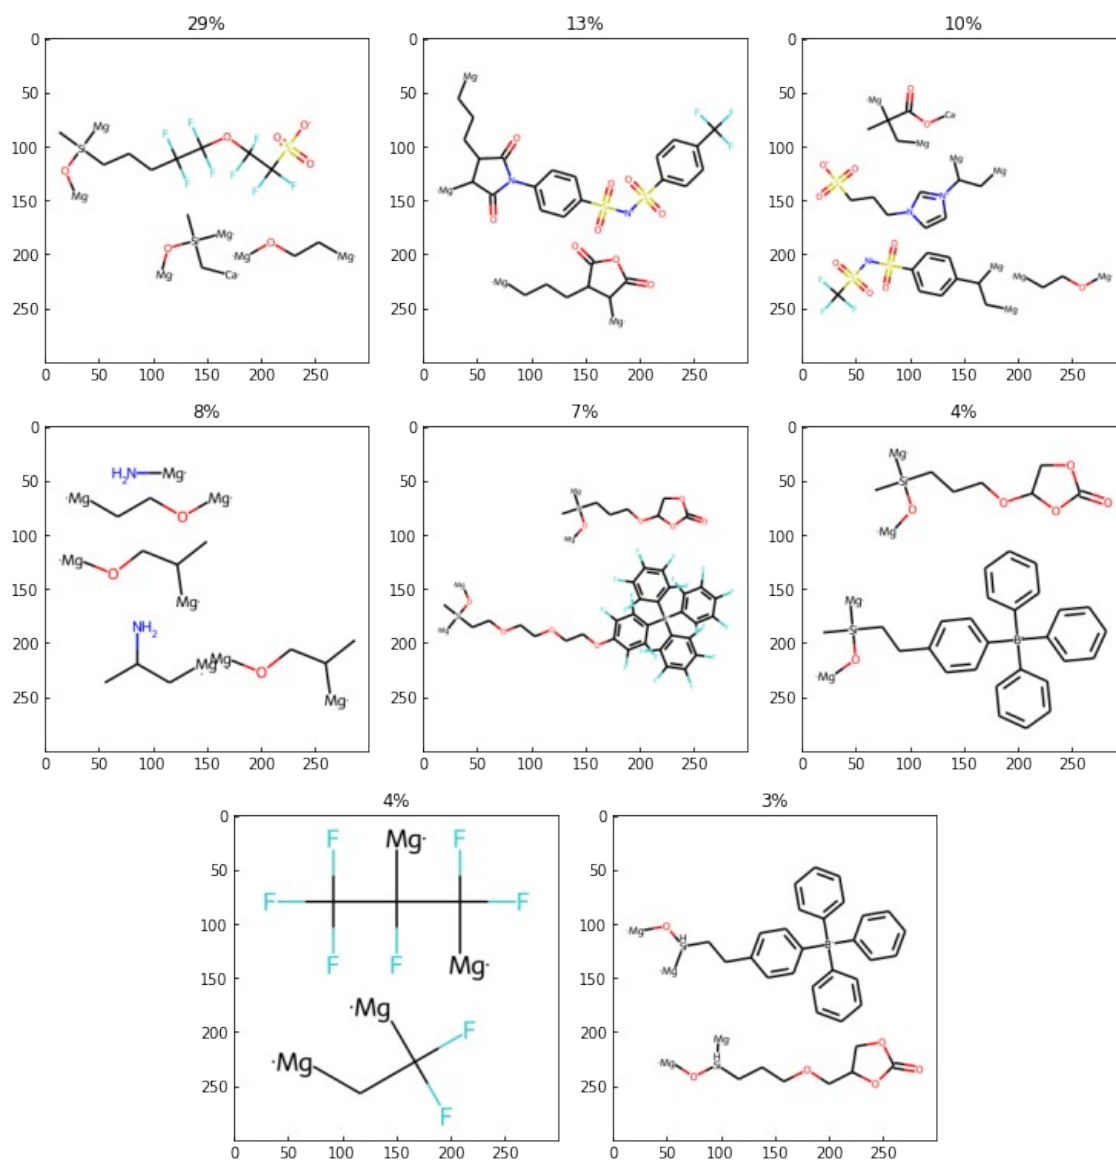

**Fig. S2** Electrolyte structures similar to sampled solution 1. Cosine similarities are shown above the structure images. Repeating unit symbols are expressed as Mg or Ca atoms.

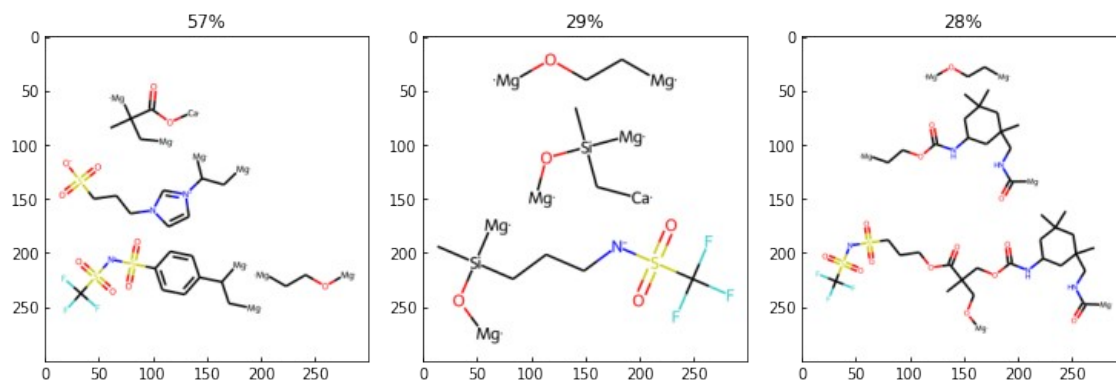

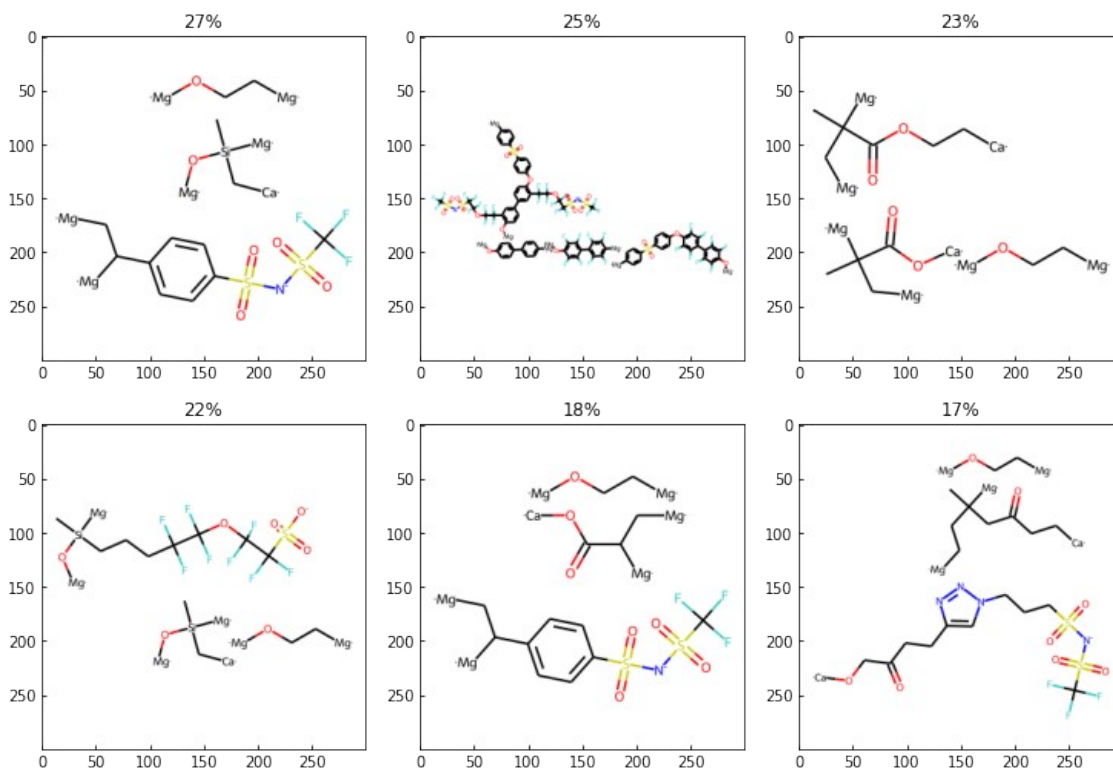

**Fig. S3** Electrolyte structures similar to sampled solution 2. Cosine similarities are shown above the structure images. Repeating unit symbols are expressed as Mg or Ca atoms.

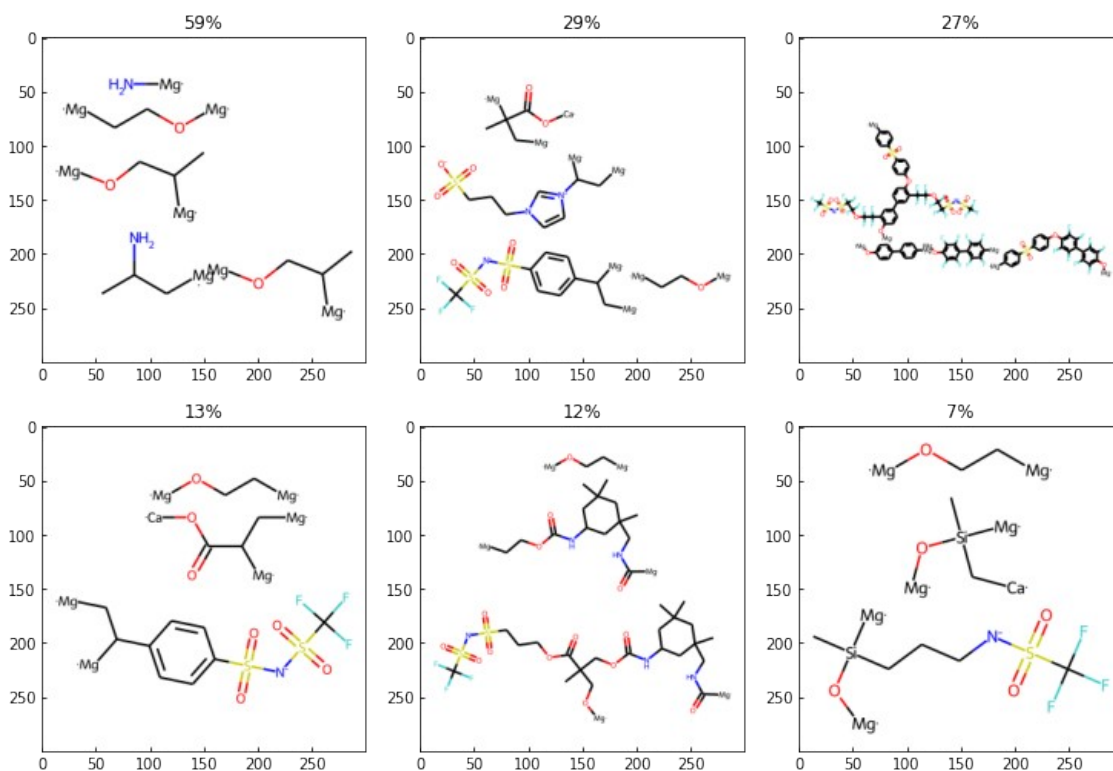

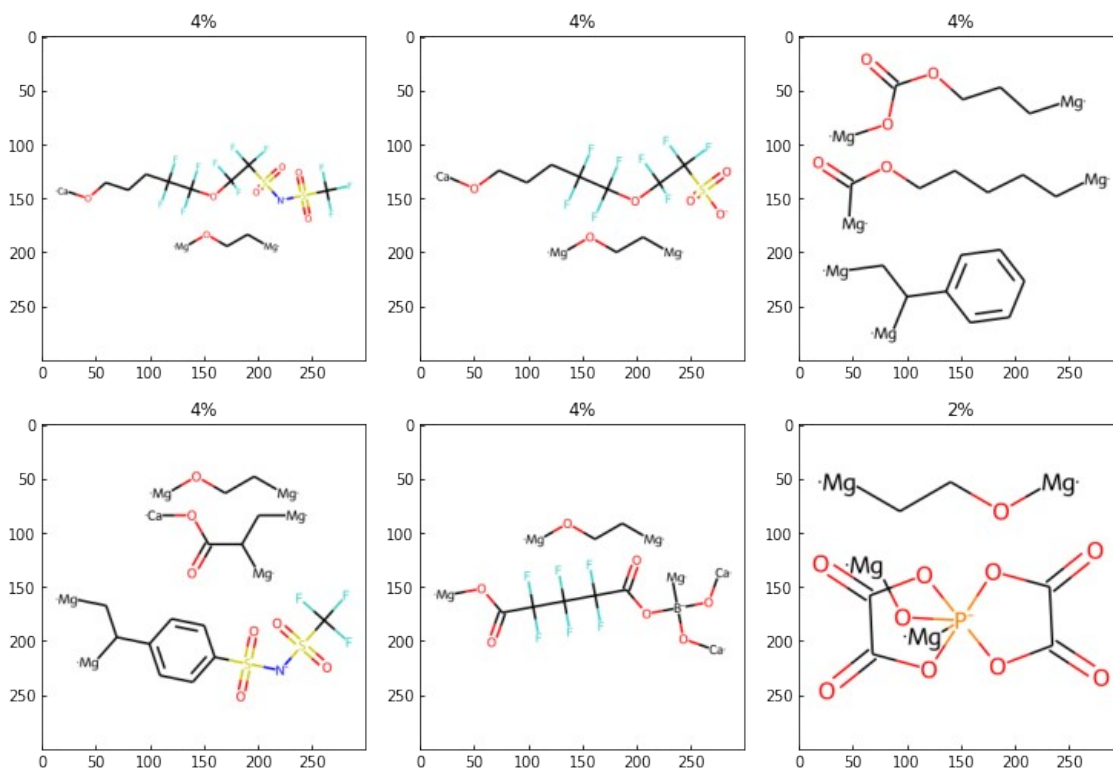

**Fig. S4** Electrolyte structures similar to sampled solution 3. Cosine similarities are shown above the structure images.

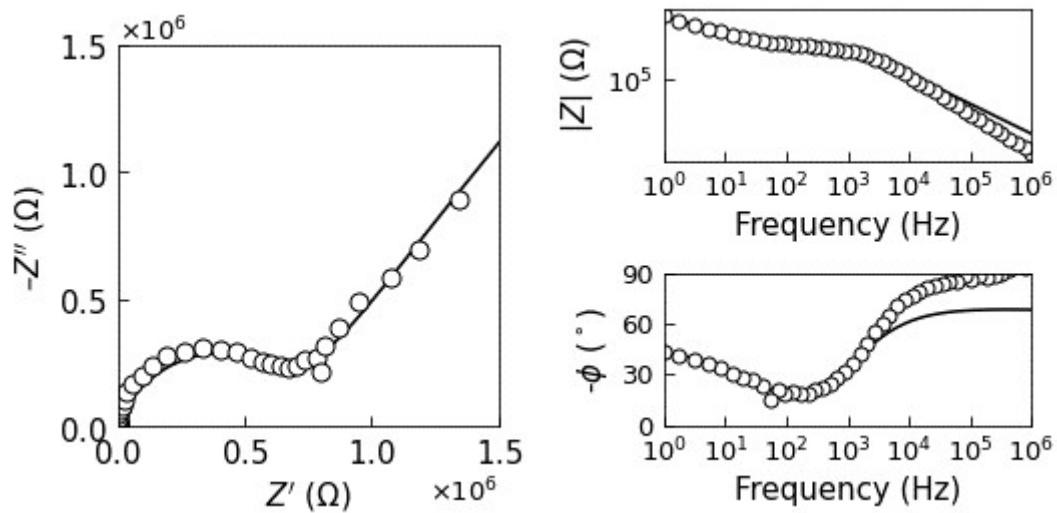

**Fig. S5** Nyquist and Bode plots for the 5 mol % polymer composite.

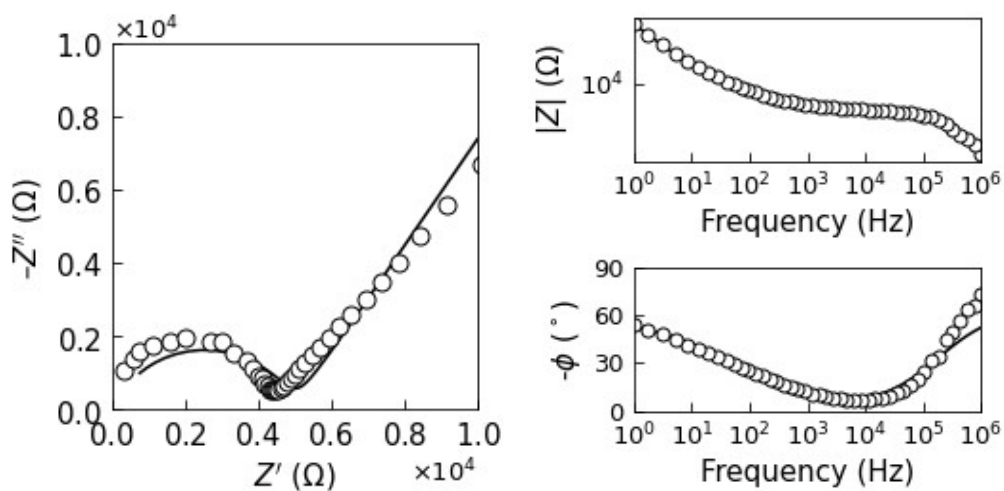

**Fig. S6** Nyquist and Bode plots for the 11 mol % polymer composite.

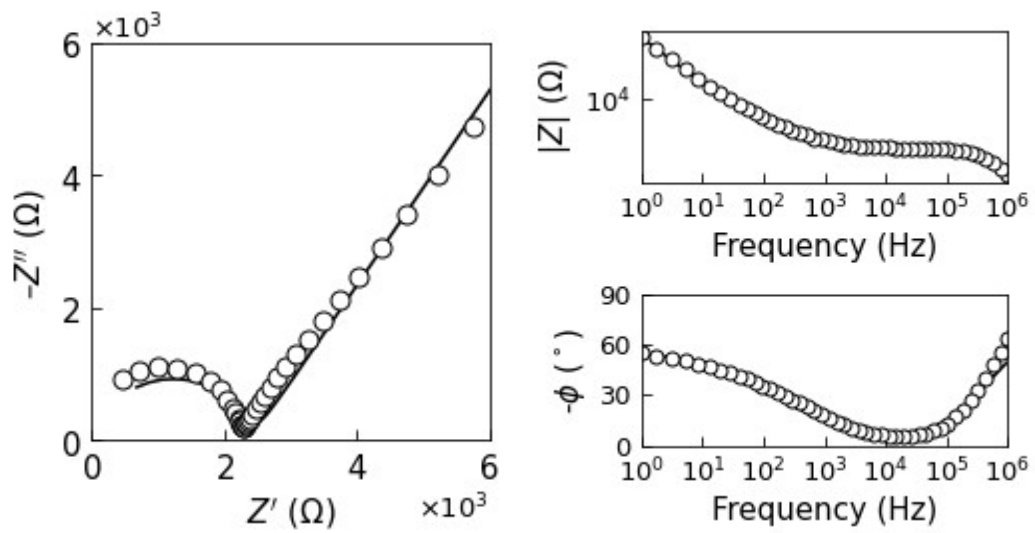

**Fig. S7** Nyquist and Bode plots for the 25 mol % polymer composite.

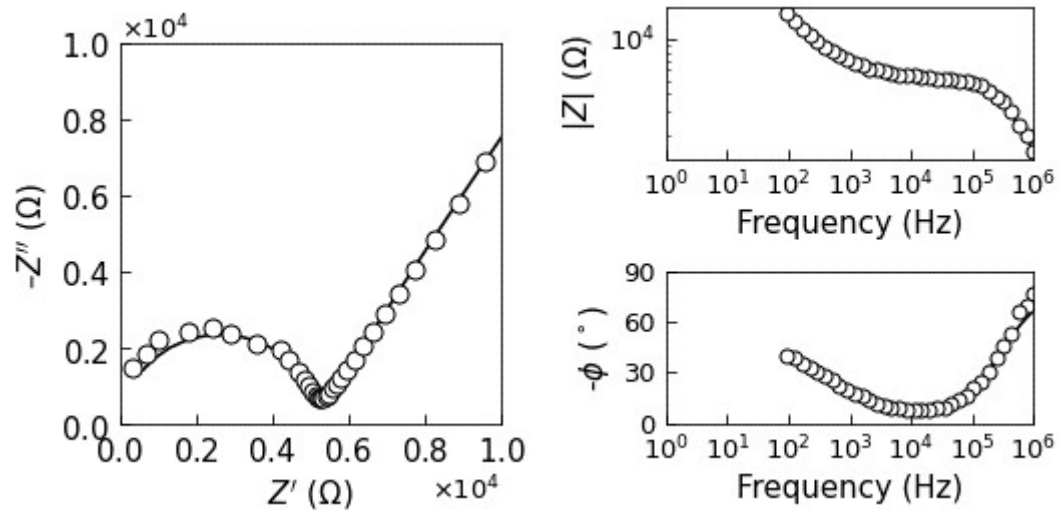

**Fig. S8** Nyquist and Bode plots for the 33 mol % polymer composite.



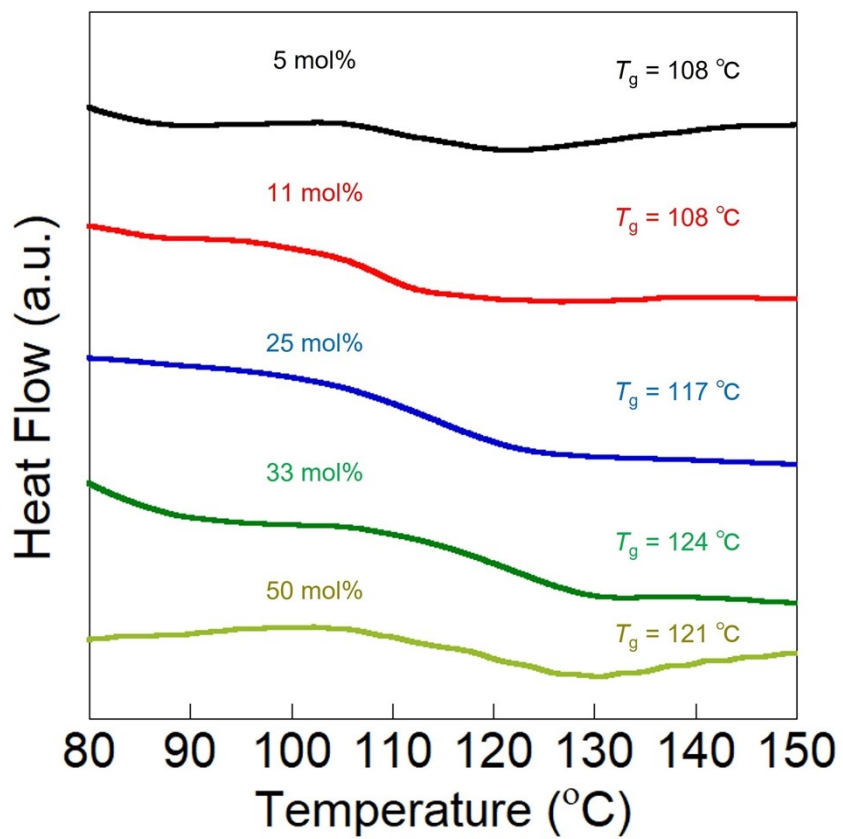

**Fig. S9** DSC curve for the different electrolytes.
